# Supplementary material for: Targeting Oxidative Phosphorylation Reverses Drug Resistance in Cancer Cells by Blocking Autophagy Recycling
Source: PubMed Central journal article supplement (PMC7565066; doi:10.3390/cells9092013), 2020-09-01
Supplement: cells-09-02013-s001.pdf [file cells-09-02013-s001.pdf]

**A**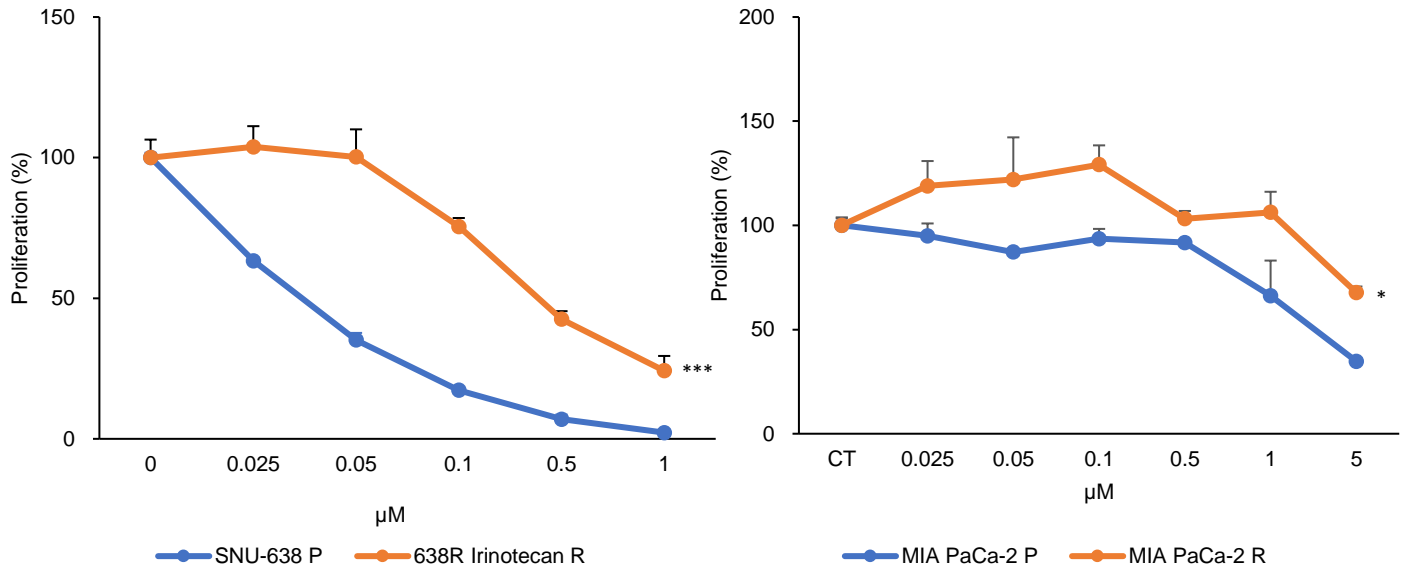

**Figure S1. Irinotecan-resistant cancer cells were established through long-term treatment.** The effect of irinotecan on irinotecan-resistant SNU-638 and MIA PaCa-2 cells after 48 h was determined by SRB assay (n=3). Each bar represents the mean + s.d. \*p < 0.05, \*\*p < 0.01, \*\*\*p < 0.001.

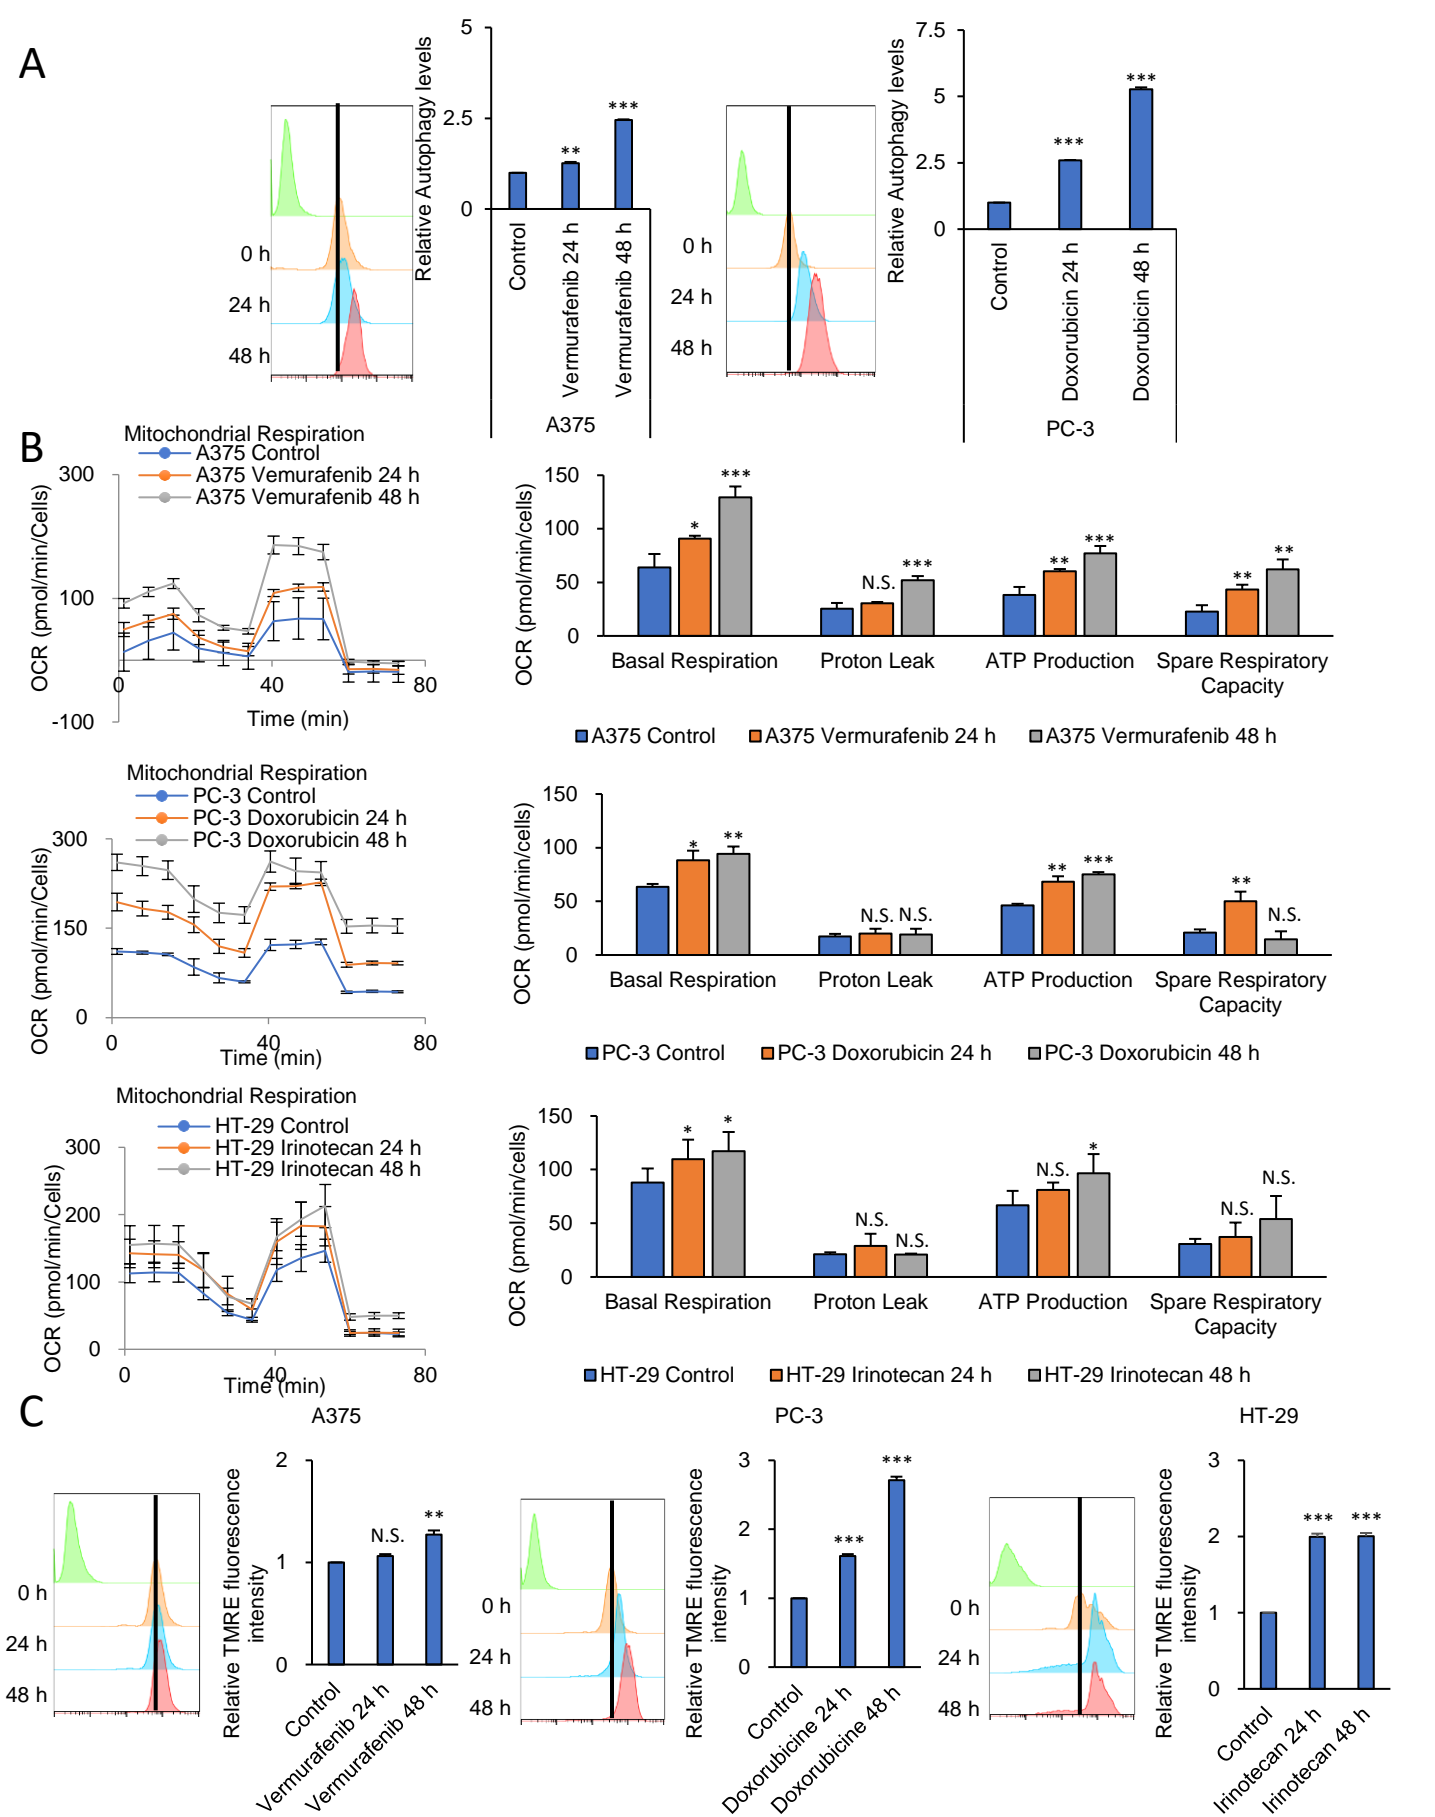

**Figure S2. Anti-cancer drug treatment induces autophagy and Oxygen Consumption Rate.**

(A) Autophagy levels were analyzed by Cyto-ID autophagy detection kit in anti-cancer drug treatment cancer cells and non-treatment cancer cells (Vemurafenib; 0.5  $\mu$ M and Doxorubicin; 1  $\mu$ M treatment). (B) Oxygen Consumption Rates and respiration parameters were analyzed in A375, PC-3 and HT-29 after treatment anti-cancer drug (Vemurafenib; 0.5  $\mu$ M, Doxorubicin; 1  $\mu$ M and Irinotecan; 0.5  $\mu$ M) treatment for 24 h and 48 h (n=4). (C) Mitochondrial membrane potential was Analyzed by staining TMRE. Mitochondrial membrane potential was increased in anti-cancer drug treatment cancer cells compared to non-treatment cancer cells (n=3). Each bar represents the mean + s.d. \*p < 0.05, \*\*p < 0.01, \*\*\*p < 0.001.

**A**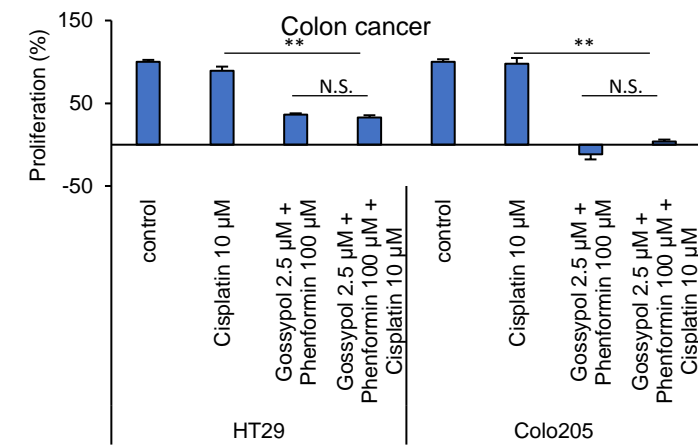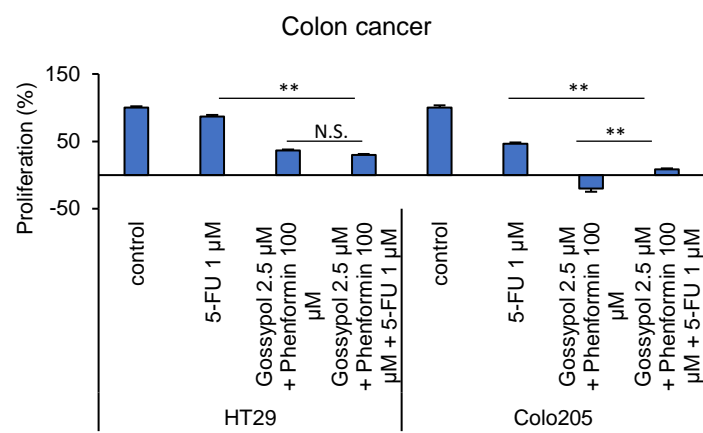**B**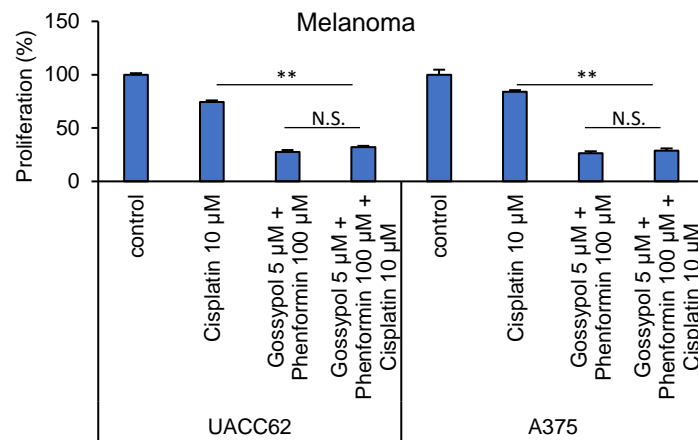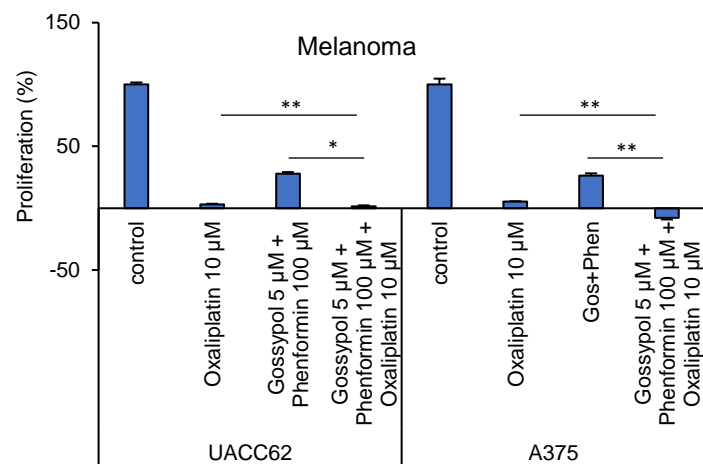**C**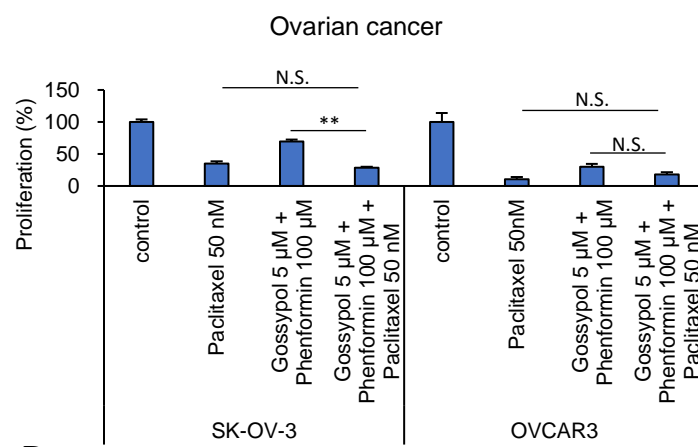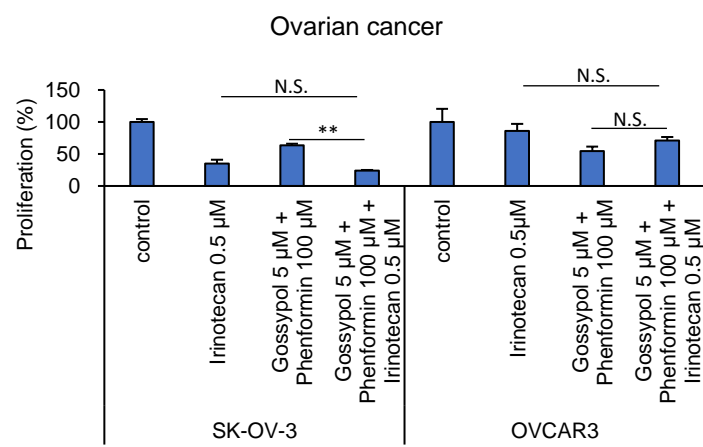**D**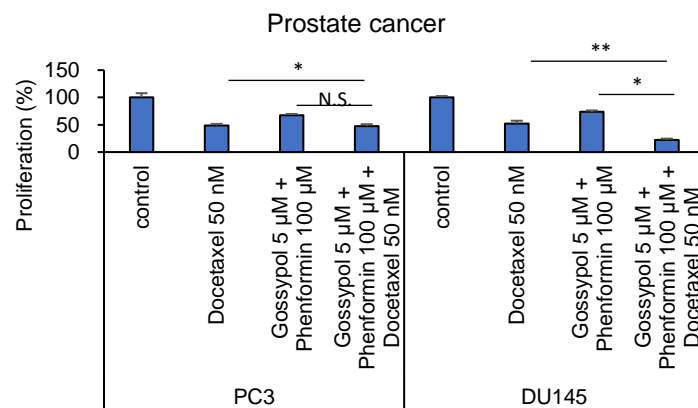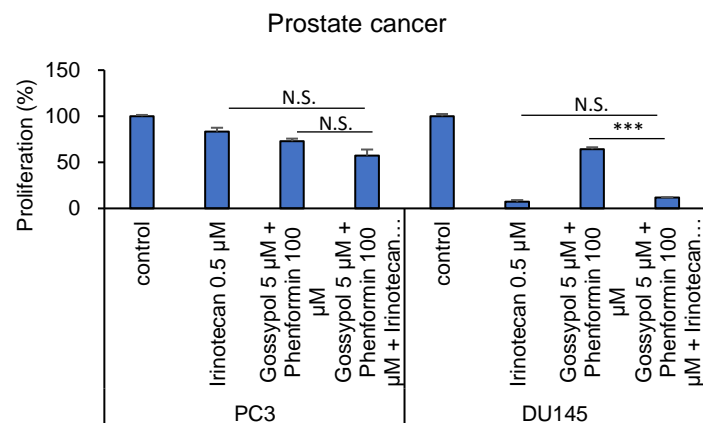

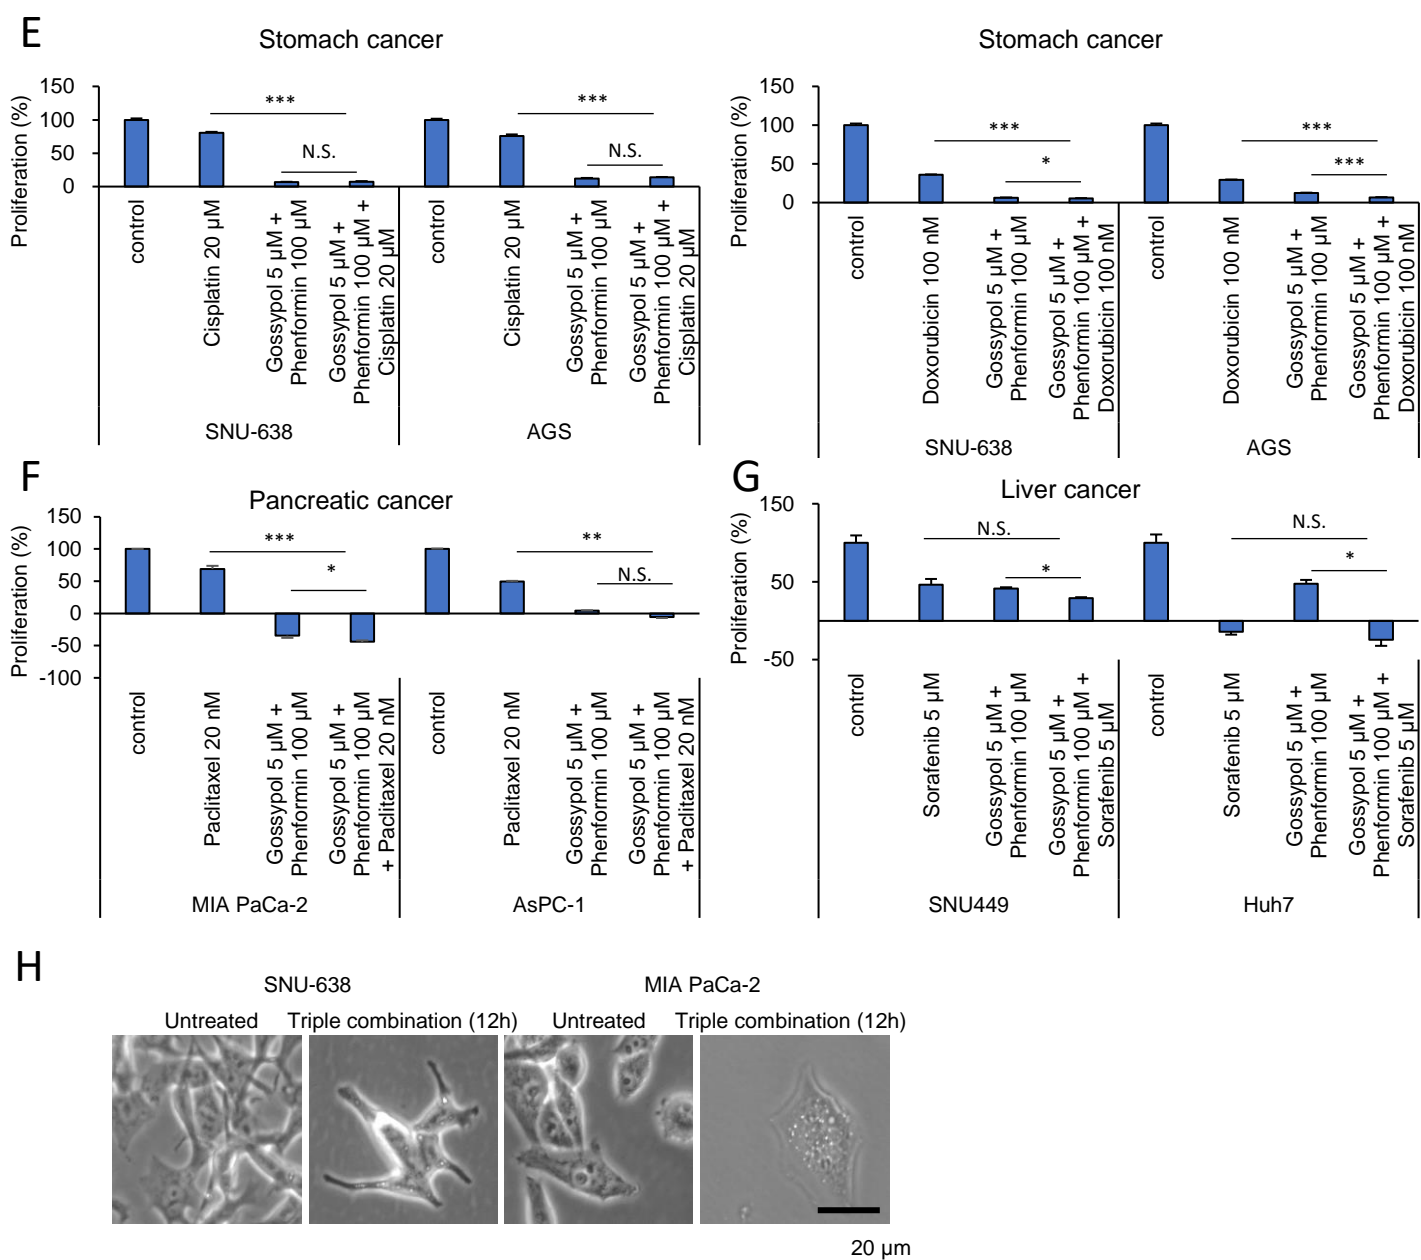

**Figure S3. The cell death induced by triple combination treatment showed a Autophagic cell death morphology.** (A-G) Non-synergistic effect of triple-combined treatment of 2.5  $\mu\text{M}$  or 5  $\mu\text{M}$  gossypol, 100  $\mu\text{M}$  phenformin and indicated anti-cancer drug after 48 h on cell proliferation was determined by SRB assay. (H) MIA PaCa-2 and SNU-638 cells were treated with triple-combination of 5  $\mu\text{M}$  gossypol, 100  $\mu\text{M}$  phenformin and irinotecan (SNU-638; 0.5  $\mu\text{M}$  and MIA PaCa-2; 1  $\mu\text{M}$ ) for indicated times, and then cells were imaged by means of a microscope. Scale bar = 20  $\mu\text{m}$ . Each bar represents the mean + s.d. \* $p < 0.05$ , \*\* $p < 0.01$ , \*\*\* $p < 0.001$ .

| A                |                                                                                                         | B                |                                                                                                                                        |
|------------------|---------------------------------------------------------------------------------------------------------|------------------|----------------------------------------------------------------------------------------------------------------------------------------|
| Cell line        | Colo 205                                                                                                | Cell line        | A375                                                                                                                                   |
| Mice             | BALB/c-nude (Orient)                                                                                    | Mice             | BALB/c-nude (Orient)                                                                                                                   |
| N (Head)         | 3                                                                                                       | N (Head)         | 7                                                                                                                                      |
| Drug delivery    | Gossypol, Phenformin: PO<br>Irinotecan: IP                                                              | Drug delivery    | Gossypol, Phenformin and Vemurafenib: PO                                                                                               |
| Treatment on/off | Gossypol, Phenformin: On (6) Off (1)<br>Irinotecan: On (1) Off (6)                                      | Treatment on/off | Gossypol, Phenformin: On (6) Off (1)<br>Vemurafenib: On (5) Off (2)                                                                    |
| Week             | 3                                                                                                       | Week             | 3                                                                                                                                      |
| Drug dose        | Gossypol: 80 mg/kg<br>Phenformin: 100 mg/kg<br>Irinotecan: 40 mg/kg                                     | Drug dose        | Gossypol: 80 mg/kg<br>Phenformin: 100 mg/kg<br>Vemurafenib: 30 mg/kg                                                                   |
| Drug vehicle     | Gossypol and Phenformin: 5 % DMSO, 5 %<br>cremophor and 90 % PBS<br>Irinotecan: 5 % DMSO and 95 % water | Drug vehicle     | Gossypol and Phenformin: 5 % DMSO, 5 %<br>cremophor and 90 % PBS<br>Vemurafenib: 4 % DMSO + 30 % PEG300 +<br>5 % Tween 80 + 61 % water |
| IRB Number       | NCC-18-435                                                                                              | IRB Number       | NCC-18-435                                                                                                                             |
| C                |                                                                                                         | D                |                                                                                                                                        |
| Cell line        | SK-OV-3                                                                                                 | Cell line        | PC-3                                                                                                                                   |
| Mice             | BALB/c-nude (Orient)                                                                                    | Mice             | BALB/c-nude (Orient)                                                                                                                   |
| N (Head)         | 4                                                                                                       | N (Head)         | 4                                                                                                                                      |
| Drug delivery    | Gossypol, Phenformin: PO<br>Cisplatin: IP                                                               | Drug delivery    | Gossypol, Phenformin: PO<br>Doxorubicine: PO                                                                                           |
| Treatment on/off | Gossypol, Phenformin: On (6) Off (1)<br>Cisplatin: On (2) Off (5)                                       | Treatment on/off | Gossypol, Phenformin: On (6) Off (1)<br>Doxorubicin: On (5) Off (2)                                                                    |
| Week             | 6                                                                                                       | Week             | 2                                                                                                                                      |
| Drug dose        | Gossypol: 40 mg/kg<br>Phenformin: 100 mg/kg<br>Cisplatin: 4 mg/kg                                       | Drug dose        | Gossypol: 80 mg/kg<br>Phenformin: 100 mg/kg<br>Doxorubicin: 5 mg/kg                                                                    |
| Drug vehicle     | Gossypol and Phenformin: 5 % DMSO, 5 %<br>cremophor and 90 % PBS<br>Cisplatin: water                    | Drug vehicle     | Gossypol and Phenformin: 5 % DMSO, 5 %<br>cremophor and 90 % PBS<br>Doxorubicin: 5 % DMSO and 95 % water                               |
| IRB Number       | NCC-18-435                                                                                              | IRB Number       | NCC-18-435                                                                                                                             |
| E                |                                                                                                         | F                |                                                                                                                                        |
| Cell line        | SNU-638                                                                                                 | Cell line        | MIA PaCa-2                                                                                                                             |
| Mice             | BALB/c-nude (Orient)                                                                                    | Mice             | BALB/c-nude (Orient)                                                                                                                   |
| N (Head)         | 5                                                                                                       | N (Head)         | 5                                                                                                                                      |
| Drug delivery    | Gossypol, Phenformin: PO<br>Irinotecan: IP                                                              | Drug delivery    | Gossypol, Phenformin: PO<br>Irinotecan: IP                                                                                             |
| Treatment on/off | Gossypol, Phenformin: On (6) Off (1)<br>Irinotecan: On (1) Off (6)                                      | Treatment on/off | Gossypol, Phenformin: On (6) Off (1)<br>Irinotecan: On (1) Off (6)                                                                     |
| Week             | 5                                                                                                       | Week             | 4                                                                                                                                      |
| Drug dose        | Gossypol: 80 mg/kg<br>Phenformin: 100 mg/kg<br>Irinotecan: 10 mg/kg                                     | Drug dose        | Gossypol: 80 mg/kg<br>Phenformin: 100 mg/kg<br>Irinotecan: 40 mg/kg                                                                    |
| Drug vehicle     | Gossypol and Phenformin: 5 % DMSO, 5 %<br>cremophor and 90 % PBS<br>Irinotecan: 5 % DMSO and 95 % water | Drug vehicle     | Gossypol and Phenformin: 5 % DMSO, 5 %<br>cremophor and 90 % PBS<br>Irinotecan: 5 % DMSO and 95 % water                                |
| IRB Number       | NCC-20-558                                                                                              | IRB Number       | NCC-20-558                                                                                                                             |

**Table S1. Xenograft mouse models conditions table.**
